# Supplementary material
Source: PubMed Central journal article supplement (PMC4160749)
Supplement: ml500156v_si_001.pdf [file ml500156v_si_001.pdf]

**Supporting information:**

# **Propyphenazone-based Analogs as Prodrugs and Selective Cyclooxygenase-2 Inhibitors.**

**Mohamed F. Radwan<sup>a-b</sup>, Kevin N. Dalby<sup>c,\*</sup> and Tamer S. Kaoud<sup>b-c,\*</sup>**

<sup>a</sup>Department of Medicinal Chemistry, Faculty of Pharmacy, Minia University, 61519 Minia, Egypt

<sup>b</sup>Department of Pharmaceutical Chemistry, Faculty of Pharmacy, King Abdulaziz University, Jeddah 21589, Kingdom of Saudi Arabia

<sup>c</sup>Division of Medicinal Chemistry, College of Pharmacy, The University of Texas at Austin, Austin, Texas 78712, United States

\*Corresponding authors: Kevin N. Dalby or Tamer S. Kaoud

107 West Dean Keaton, BME, The University of Texas at Austin, TX 78712, USA. E mail: [kinases@me.com](mailto:kinases@me.com) or [tkaood1@utexas.edu](mailto:tkaood1@utexas.edu).

## Supplementary Figures

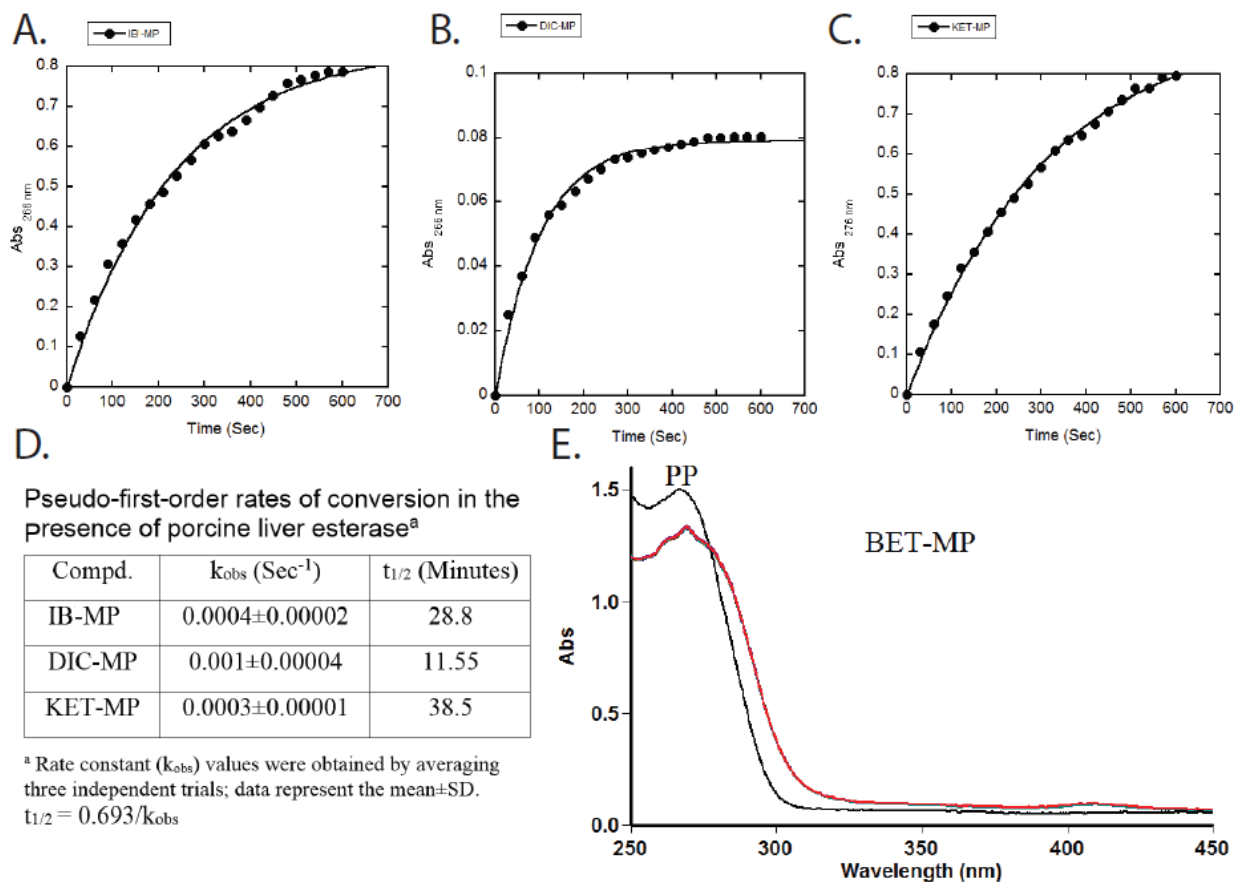

**Figure S1:** Pseudo-first-order kinetic measurements of the rates of conversion in the presence of porcine liver esterase (PLE) were performed using UV–Vis absorption spectroscopy for IB-MP (A), DIC-MP (B) and KET-MP (C). Pseudo-first-order rates of release of each prodrug in the presence of porcine liver esterase is calculated and shown in table (D). Absorption spectra of BET-MP (E) in the presence of porcine liver esterase (PLE) monitored every 4 minutes for 100 min. The red line represents initial absorbance spectrum before addition of PLE. One labeled line represents the absorbance of an authentic sample of propyphenazone (PP).

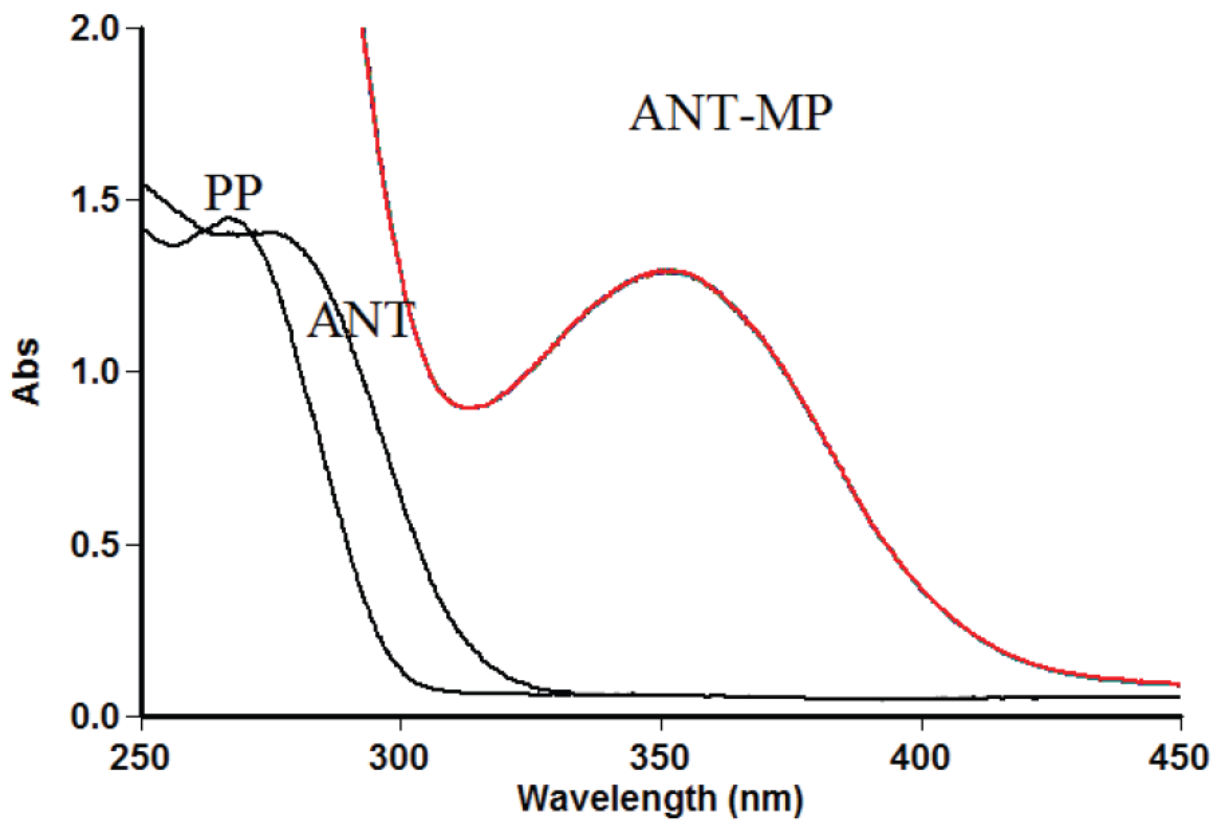

**Figure S2.** Absorption spectra of ANT-MP in the presence of porcine liver esterase (PLE) monitored every 4 minutes for 100 min. The red line represents initial absorbance spectrum before addition of PLE. Two labeled lines depict the absorption spectra of authentic samples of propyphenazone (PP) and 4-aminoantipyrine (ANT).

## **Experimental Section**

### ***Materials.***

Melting points (m.p.) were determined on digital electro-thermal melting point apparatus (BI, Barnstead, UK) and were uncorrected. Follow up the reactions progress was came out using TLC technique utilizing silica gel F254 pre-coated plates 20 x 20 cm, layer thickness 0.2 mm (E. Merck, Darmstadt, Germany). The *in vitro* COX selectivity tests were carried on Perkin-Elmer (Waltham, MA) VICTOR3V 1420 multilabel counter plate reader (Excitation filter F540 and emission filter F572). COX fluorescent inhibitor screening assay kits were purchased from Cayman Chemical Company, Ann Arbor, MI, USA. Computer program Prism was used for studying the statistical analyses. Values of  $p < 0.05$  or  $p < 0.01$  (significant difference) were used as the limit for statistical significance.

### **Animals**

Either male sprague dawely rats, weighing 200-250 g (for the analgesic assay) or male swiss albino mice, weighing 20-25 g (for the anti-inflammatory assay), were obtained from King Fahad Medical Research Center, King Abdulaziz University, Jeddah, Saudi Arabia. All animal treatments were approved by the local Biomedical Ethics Committee, Faculty of Pharmacy, King Abdulaziz University. Animals were acclimatized in the animal facility with controlled temperature ( $23 \pm 2$  °C), humidity ( $55 \pm 10\%$ ), and photoperiod (12:12 h) for 7 days before experiments. A minimum of 4 animals was used in each group.

### **Statistical analysis**

All data are expressed as means  $\pm$  SE. Multiple group comparisons were carried out using one-way analysis of variance (ANOVA) followed by the Tukey–Kramer test for post hoc analysis. Statistical significance was accepted at a level of  $P < 0.05$ . All statistical analyses were

performed using GraphPad InStat software, version 3.05 (GraphPad Software, Inc., La Jolla, CA, USA).

### **Chemistry.**

#### **5-(bromomethyl)-4-isopropyl-1-methyl-2-phenyl-1H-pyrazol-3(2H)-one (BMP).**

A solution of bromine solution (6.95 g, 44 mmol) in CH<sub>2</sub>Cl<sub>2</sub> (5 ml) was added drop wise to an ice-cooled stirred solution of propyphenazone (10 g, 43.5 mmol) in a mixture of CH<sub>2</sub>Cl<sub>2</sub>: dioxane (4: 1, v/v) (25 ml) and the reaction mixture was left while stirring for 1 hour. Then 30 ml 10% cold aqueous sodium carbonate solution was added with vigorous shaking. The organic phase was separated and dried over anhydrous Na<sub>2</sub>SO<sub>4</sub>, filtered, and concentrated under vacuum at 40 °C until the volume was about 10 ml. The reaction mixture was cooled to room temperature, and about 15 ml diethyl ether was added. This solution was left to stand in stoppered flask at room temperature in dark. The colorless crystals formed were separated and washed with cold diethyl ether. (yield: 94%, m.p. 90 °C, reported yield 86%, m.p. 96 °C). *MS data* for C<sub>14</sub>H<sub>17</sub> Br N<sub>2</sub>O (309.2) m/z: M<sup>+</sup> 309 (100%); 311 (98%); MS<sup>2</sup> of 309: 215 (100%); 230 (28%); 201 (9%); 267 (4%). <sup>1</sup>H-NMR (CDCl<sub>3</sub>, 400 MHz) δ (ppm): 1.1 (d, 6H, -CH(CH<sub>3</sub>)<sub>2</sub>); 2.5-2.65 (m, 1H, -CH(CH<sub>3</sub>)<sub>2</sub>); 3.2 (s, 3H, N-CH<sub>3</sub>); 4.02 (s, 2H, -CH<sub>2</sub>-Br); 7.0-7.2 (m, 1H, *p*-phenyl-H; 7.4-7.3 (m, 4H, *o*- & *m*-phenyl-H).

#### **5-(Hydroxymethyl)-4-isopropyl-1-methyl-2-phenyl-1H-pyrazol-3(2H)-one (HPP).**

Bromopropyphenazone (3.0 g, 9.7 mmol) was heated with water (100 ml) for 30 minutes and allowed to attain room temperature. The precipitated solid was filtered, washed, and recrystallized from dried diethyl ether (yield: 96%, m.p. 125 °C, reported yield, m.p. 00 °C). M+H (247), *MS data* for C<sub>14</sub>H<sub>18</sub> N<sub>2</sub> O<sub>2</sub>. (246.3) m/z: 217 (100%), 175 (100%), 205 (41%), 187 (23%), 159 (19%), 229 (7%). <sup>1</sup>H- NMR (CDCl<sub>3</sub>, 400 MHz) δ (ppm): 1.1 ( d, 6H, -CH(CH<sub>3</sub>)<sub>2</sub>),

2.5-2.6 (m, 1H, -CH(CH<sub>3</sub>)<sub>2</sub>), 3.2 (s, 3H, N-CH<sub>3</sub>), 3.2 (b, 1H, -OH), 4.3 (s, 2H, -CH<sub>2</sub>-OH), 7.0-7.1 (m, 1H, p-phenyl-H), 7.3-7.4 (m, 4H, o- & m-phenyl-H).

***(4-isopropyl-2-methyl-5-oxo-1-phenyl-2,5-dihydro-1H-pyrazol-3-yl)methyl 2-(4-isobutylphenyl)propanoate (IB-MP).***

A mixture of bromopropyphenazone (0.50 g, 1.6 mmol), ibuprofen (0.33 g, 1.6 mmol) and anhydrous K<sub>2</sub>CO<sub>3</sub> (1.0 g) in acetone (15 ml) was heated under reflux with stirring for 1 h. After being cooled to room temperature, the reaction mixture was evaporated under vacuum at 30 °C, and the remaining residue was treated with CH<sub>2</sub>Cl<sub>2</sub> (50 ml). The organic layer was separated, washed with H<sub>2</sub>O, dried over anhydrous Na<sub>2</sub>SO<sub>4</sub>, filtered, and evaporated under vacuum at 35°C. The remained pale yellow viscous mass was further dried in a vacuum dessicator (over anhydrous CaCl<sub>2</sub>) (yield, 94%). <sup>1</sup>H-NMR (CDCl<sub>3</sub>, 400 MHz) δ (ppm): 0.87 (d, 6H, -CH<sub>2</sub>-CH(CH<sub>3</sub>)<sub>2</sub>), 1.27 (d, 6H, -C-CH(CH<sub>3</sub>)<sub>2</sub>), 1.55 (d, 3H, -CH-CH<sub>3</sub>), 1.8-1.9 (m, 1H, -CH<sub>2</sub>-CH(CH<sub>3</sub>)<sub>2</sub>), 2.45 (d, 2H, -CH<sub>2</sub>-CH(CH<sub>3</sub>)<sub>2</sub>), 2.78 (s, 3H, N-CH<sub>3</sub>), 2.87-2.95 (m, 1H, -C-CH(CH<sub>3</sub>)<sub>2</sub>), 5.6 (d, 2H, O-CH<sub>2</sub>-C), 7.11 (d, 2H, phenyl-H), 7.21 (d, 1H, phenyl-H), 7.26-7.29 (m, 2H, phenyl-H), 7.42-7.44 (m, 4H, phenyl-H). <sup>13</sup>C-NMR (CDCl<sub>3</sub>, 500 MHz) δ (ppm): 15.1 (CH<sub>3</sub>), 20.9, 20.9 (CH<sub>3</sub>), 22.1, 22.1 (CH<sub>3</sub>), 29.9 (CH), 36.1 (CH), 44.8 (CH<sub>3</sub>), 55.0 (CH), 44.5 (CH<sub>2</sub>), 65.7 (CH<sub>2</sub>), 119.3, 147.6 (pyrazolone C), 123.4, 126.1, 126.9, 126.9, 128.7, 128.7 (Ar C), 126.1, 129.2, 129.2, 136.4, 136.4, 140.2 (Ar C), 164.1 (CO), 173.7 (CO). MS (ESI) m/z C<sub>27</sub>H<sub>34</sub>N<sub>2</sub>O<sub>3</sub> calculated M+1: 435.57 found 435.951

***[(4-isopropyl-2-methyl-5-oxo-1-phenyl-2,5-dihydro-1H-pyrazol-3-yl)methyl 2-(2-((2,6-dichlorophenyl)amino)phenyl)acetate](DIC-MP).***

A mixture of bromopropyphenazone (0.50 g, 1.6 mmol), diclofenac (0.48 g, 1.6 mmol) and

anhydrous  $K_2CO_3$  (1.0 g) in acetone (15 ml) was heated under reflux with stirring for 1 h. Working up the reaction mixture was carried out as described under compound **3**. The yellowish brown solid was further dried in vacuum desiccator over  $CaCl_2$ , overnight, in dark (m. p.  $104^\circ C$ , yield, 89%).  $^1H$ -NMR ( $CDCl_3$ , 400 MHz)  $\delta$  (ppm): 1.33 (d, 6H,  $-CH(CH_3)_2$ ), 1.66 (d, 1H,  $-CH(CH_3)_2$ ), 2.90-2.93 (m, 1H,  $-C-CH(CH_3)_2$ ), 2.91 (s, 3H, N- $CH_3$ ), 3.81 (s, 2H,  $-CO-CH_2-C$ ), 4.59 (s, 1H, C- $NH-C$ ), 5.14 (s, 2H,  $-C-CH_2-O$ ), 6.59 (d, 1H, phenyl-H), 6.99 (d, 1H, phenyl-H), 7.01-7.04 (m, 2H, phenyl-H), 7.27-7.29 (m, 4H, phenyl-H), 7.42-7.47 (m, 4H, phenyl-H).  $^{13}C$ -NMR ( $CDCl_3$ , 500 MHz)  $\delta$  (ppm): 21.0, 21.0 ( $CH_3$ ), 24.3 (CH), 36.3 ( $CH_3$ ), 38.1 ( $CH_2$ ), 55.6 ( $CH_2$ ), 118.7, 147.1 (pyrazolone C), 118.7, 122.1, 122.1, 128.6, 128.6, 129.3 (Ar C), 123.1, 128.8, 128.8, 130.7, 137.4, 137.4 (Ar C), 122.1, 123.7, 123.7, 128.8, 128.8, 134.3 (Ar C), 164.0 (CO), 171.3 (CO). MS (ESI) m/z  $C_{28}H_{27}Cl_2N_3O_3$  calculated M+1 : 524.44 found 524.654.

***[(4-isopropyl-2-methyl-5-oxo-1-phenyl-2,5-dihydro-1H-pyrazol-3-yl)methyl 2-(4-benzoylphenyl)propanoate](KET-MP).***

A mixture of bromopyphenazone (0.50 g, 1.6 mmol), ketoprofen (0.41 g, 1.6 mmol) and anhydrous  $K_2CO_3$  (1.0 g) in acetone (15 ml) was heated under reflux with stirring for 1 h. Working up the reaction mixture was carried out as described under compound **3**. The yellow viscous mass was further dried in vacuum desiccator over  $CaCl_2$ , overnight, in dark (yield, 86%).  $^1H$ -NMR ( $CDCl_3$ , 400 MHz)  $\delta$  (ppm): 1.26 (d, 6H,  $-CH(CH_3)_2$ ), 1.62 (d, 3H,  $CH-CH_3$ ), 2.69-2.71 (m, 1H,  $-CH(CH_3)_2$ ), 2.87 (s, 3H, N- $CH_3$ ), 3.9-3.92 (m, 1H,  $CH-CH_3$ ), 5.05 (s, 2H, C- $CH_2-O$ ), 7.27-7.29 (m, 2H, phenyl-Hs), 7.34-7.35 (m, 2H, phenyl-Hs), 7.42-7.51 (ddd, 5H, phenyl-Hs), 7.56-7.62 (dd, 2H, phenyl-Hs), 7.70 (d, 1H, phenyl-H), 7.79 (d, 1H, phenyl-H).  $^{13}C$ -NMR ( $CDCl_3$ , 500 MHz)  $\delta$  (ppm): 17.9 ( $CH_3$ ), 20.9, 20.9 ( $CH_3$ ), 24.2 (CH), 36.3 ( $CH_3$ ), 45.0 (CH),

65.6 (CH<sub>2</sub>), 119.6, 137.9 (pyrazolone C), 123.4, 126.2, 126.2, 128.2, 128.2, 134.3 (Ar C 128.2, 128.4, 128.4, 132.4, 134.3, 134.3 (Ar C), 128.4, 128.4, 130.3, 130.3, 132.4, 138.4 (Ar C)), 164.0 (CO), 172.7 (CO), 196.0 (CO). MS (ESI) m/z C<sub>30</sub>H<sub>30</sub>N<sub>2</sub>O<sub>4</sub> calculated M+1 : 483.2 found 483.600

***[3-((Methyl(2-(pyridine-2-yl)ethylamino)methyl)-2-methyl-4-isopropyl-1-phenyl-3-pyrazolin-5-one)] (BET-MP).***

A mixture of bromopropyphenazone (0.50 g, 1.6 mmol), betahistine (0.22 g, 1.6 mmol) and anhydrous K<sub>2</sub>CO<sub>3</sub> (1.0 g) in acetone (15 ml) was heated under reflux with stirring for 1 h. Working up the reaction mixture was carried out as described under compound **3**. The pale brown viscous mass was dried in vacuum desiccator over CaCl<sub>2</sub>, overnight, in dark (yield, 92%). <sup>1</sup>H-NMR (CD<sub>3</sub>OD, 400 MHz) δ (ppm): 1.28 (d, 6H, -CH(CH<sub>3</sub>)<sub>2</sub>), 2.36 (s, 3H, s, N-CH<sub>3</sub>), 2.44-2.46 (m, 1H, -CH(CH<sub>3</sub>)<sub>2</sub>), 2.81 (s, 2H, -CH<sub>2</sub>-), 2.86 (s, 4H, 2-CH<sub>2</sub>-), 3.5 (s, 3H, N-CH<sub>3</sub>), 7.10-7.13 (m, 1H, phenyl-H), 7.22-7.40 (m, 2H, pyridine-H), 7.48-7.50 (m, 4H, phenyl-H), 7.55-7.60 (m, 1H, pyridine-H), 7.61-7.63 (s, 1H, pyridine-H). <sup>13</sup>C-NMR (CD<sub>3</sub>OD, 600 MHz) δ (ppm): 21.3, 21.3 (CH<sub>3</sub>), 33.7 (CH), 35.4 (CH<sub>3</sub>), 40.4 (CH<sub>3</sub>), 53.9 (CH<sub>2</sub>), 55.6 (CH<sub>2</sub>), 57.6 (CH<sub>2</sub>), 115.8, 134.9 (pyrazolone C), 123.3, 126.9, 143.5, 148.6, 153.6 (pyridine C), 126.8, 127.9, 127.9, 130.2, 130.2, 133.8 (Ar C) 164.4 (CO). MS (ESI) m/z C<sub>22</sub>H<sub>28</sub>N<sub>4</sub>O calculated M+1: 364.48 found 364.513.

***[5-(((1,5-dimethyl-3-oxo-2-phenyl-2,3-dihydro-1H-pyrazol-4-yl)amino)methyl)-4-isopropyl-1-methyl-2-phenyl-1H-pyrazol-3(2H)-one](ANT-MP).***

A mixture of bromopropyphenazone (0.50 g, 1.6 mmol), 4-aminoantipyrine (0.32 g, 1.6 mmol) and anhydrous K<sub>2</sub>CO<sub>3</sub> (1.0 g) in acetone (15 ml) was heated under reflux with stirring for 1 h. Working up the reaction mixture was carried out as described under compound **3**. The brown viscous mass was further dried in vacuum desiccator over CaCl<sub>2</sub>, overnight, in dark (yield, 92%).



$^1\text{H-NMR}$  ( $\text{CDCl}_3$ , 400 MHz)  $\delta$  (ppm): 1.37 (d, 6h,  $-\text{CH}(\text{CH}_3)_2$ ), 2.0 (s, 3H,  $\text{C-CH}_3$ ), 2.88-2.90 (m, 1H,  $-\text{CH}(\text{CH}_3)$ ), 2.94 (s, 6H, 2  $-\text{N-CH}_3$ ), 4.36 (s, 2H,  $-\text{CH}_2-$ ), 7.27-7.33 (m, 2H, 2 phenyl  $p$ -CH), 7.46-7.51 (m, 8H, 2 phenyl-H).  $^{13}\text{C-NMR}$  ( $\text{CDCl}_3$ , 500 MHz)  $\delta$  (ppm): 10.2 ( $\text{CH}_3$ ), 21.1, 21.1 ( $\text{CH}_3$ ), 24.2 (CH), 35.5 ( $\text{CH}_3$ ), 36.4 ( $\text{CH}_3$ ), 46.7 ( $\text{CH}_2$ ), 117.0, 134.4 (pyrazolone C), 117.7, 133.9 (pyrazolone C), 119.3, 123.0, 123.0, 128.7, 128.7, 134.7 (Ar C), 123.0, 123.3, 123.3, 126.4, 126.4, 133.9 (Ar C), 162.8 (CO), 164.4 (CO). MS (ESI)  $m/z$   $\text{C}_{25}\text{H}_{29}\text{N}_5\text{O}_2$  calculated  $M+1$ : 431.23 found 432.050

### ***Analgesic activity***

The analgesic activity of the newly synthesized compounds was evaluated using the acetic acid induced abdominal constriction method (Writhing effect).<sup>1, 2</sup> All doses were calculated according to the method described previously by Paget et al.<sup>3</sup> Rats were divided into 12 groups as shown in tables 3 and 4. They were food deprived for 12 hours before the experiment. The drugs were suspended in carboxymethylcellulose (0.5%, CMC) as previously reported<sup>2</sup> and administered orally 1 hour before the intraperitoneal administration of acetic acid (10 ml/kg) that freshly prepared with 1% concentration. After 3 minutes of acetic acid administration, the writhes number has been recorded for each animal during 20 minutes period. The average number of writhes for each group treated with a drug has been compared to the control group. Percentage protection from writhes has been calculated for each group to express the degree of analgesia that caused by each drug.

### ***Anti-inflammatory activity***

The potential anti-inflammatory activity of the tested compounds was evaluated using carrageenan-induced paw edema model as described previously by Winter et al.<sup>4, 5</sup> Each mouse was injected into the subplantar tissue of the right hind paw with a freshly prepared suspension

of carrageenan (0.5 mg/25  $\mu$ L) in saline, 30 minutes after the subcutaneous administration of each drug (50 mg/kg body weight) or dosing vehicle. Swelling (volume) of the injected paw of each animal was measured at 1, 2, 3 and 4 hours by a mercury plethysmometer (Model 520, IITC, Life Sciences, USA).

### ***Inhibition of purified COX-1 and COX-2 activity***

Purified COX-1 (ovine) or COX-2 (human recombinant) was incubated with different concentrations of each compound and the enzyme activity was assayed *in vitro* using a fluorescent inhibitor screening assay kit (catalog number 700100, Cayman Chemical, Ann Arbor, MI, USA) following the procedure suggested by the manufacturer. Briefly, in 96-well plate, 10  $\mu$ L of various concentrations of each tested compound (to produce final concentrations of 0 - 160  $\mu$ M in 5% DMSO), either pre-treated for 1 hour at room temperature with 3.00 U of porcine liver esterase or not, were added to 150  $\mu$ L of the assay buffer (100 mM Tris-HCl, pH 8.0) that mixed with either COX-1 or COX-2 (10  $\mu$ L) enzyme in the presence of Heme (10 $\mu$ L) and 10-acetyl-3,7-dihydroxyphenoxazine (ADHP) (10  $\mu$ L) as the fluorometric substrate. After incubation for 20 minutes at room temperature, the reactions were initiated by addition of 10  $\mu$ L arachidonic acid solution and then incubated for 2 min at room temperature. Fluorescence of resorufin that is produced by the reaction between PGG<sub>2</sub> and the fluorometric substrate, were analyzed. DuP-697 (selective COX-2 inhibitor) and SC-560 (selective COX-1 inhibitor) were used as reference compounds. The measured fluorescence intensity is proportional to the amount of produced resorufin, which is proportional to the amount of PGG<sub>2</sub> present in each well during the reaction. Percent inhibition was calculated by comparison to the 100% maximum activity in absence of any inhibitor. IC<sub>50</sub> ( $\mu$ M) which corresponds to the concentration of the inhibitor that causes 50% inhibition of COX-1 or COX-2 activity was calculated from the dose response curve of inhibition

(triplicate determinations). Dose-response curves for data conforming to inhibition were fitted to:

$$V_0 = V' - \left( V' \frac{i}{i + (IC_{50})} \right) + V_{\infty}$$

Where;  $V_0$  is the observed rate;  $i$  is the concentration of inhibitor I;  $V'$  is the observed rate in the absence of inhibitor;  $V_{\infty}$  is the observed rate constant at saturating inhibitor, I;  $IC_{50}$  is the concentration that leads to half the maximal change in  $V_0$ .

### **UV-Vis spectroscopy**

Following Perez et al protocol,<sup>6</sup> 1 ml of 50  $\mu$ M solution of each compound in 25 mM HEPES buffer and 5% DMSO (pH 7.5) was treated with 2.00 U of porcine liver esterase and absorption spectra were collected on a PerkinElmer Lambda 25 UV-vis spectrophotometer every 4 minutes over 100 minutes at room temperature. The change in absorption was recorded at  $\lambda_{\max}$  of 266 nm for IB-MB, 266 nm for DIC-MP and 276 nm for KET-MP and termed  $A_{\max}$ , The pseudo-first-order rate constant ( $k_{\text{obs}}$ ) and the half life for each prodrug hydrolysis by esterase were calculated.

### **Molecular modeling**

The docking study was performed using Surflex docking program impeded in SYBYL-X v.20 molecular modeling package (Sybyl-X).<sup>7</sup> The crystal structure of COX II used in the study (Pdb Code: 3OLU)<sup>8</sup> was selected based on certain criteria to get the most suitable conditions for Surflex to predict the binding model that is closest to reality. Indeed, Surflex binding predictability is affected by the ligand of the crystal structure without ignoring features of the active site as determined by Surflex probes. The COX II crystal structure that employed in this study contains glyceryl ester of arachidonic acid (AG), a non-acidic (ester) ligand in which Arg-120 interacts with 2'-hydroxy group of the glyceryl moiety *via* a hydrogen bond but not as ionic salt bridge as in case of the free acid.<sup>9</sup> It is analogous to our compound which is devoid of

carboxylic acid groups. The second advantage of having AG as a ligand, is its long hydrophobic tail that composed of 20 carbon atoms. The end of this hydrocarbon chain (the  $\omega$  carbon) reaches the bottom of the active site which is characterized by strong hydrophobic environment. This is advantageous to our docking study because the modeled compound is significantly bulkier and its structure is characterized by having two hydrophobic terminals on both sides of the compound.

## REFERENCES

1. Koster, R. M.; Anderson, M.; Debeer, E. J. Acetic acid for analgesic screening. *Fed. Proc.* **1959**, *18*, 412-416.
2. Sawraj, S.; Bhardawaj, T.; Sharma, P. Design, synthesis and evaluation of novel indomethacin-flavonoid mutual prodrugs as safer NSAIDs. *Medicinal Chemical Research* **2011**, *20*, 687-694.
3. Paget, G. E.; Barnes, J. M. Interspecies dosage conversion scheme in evaluation of results and quantitative application in different species. In: "Evaluation of drug activities: Pharmacometrics" Vol. 1, laurence, D.R., Bacharach, A.L. [Eds.]; Academic press, London and New York. **1946**, 162-162.
4. Winter, C. A.; Risley, E. A.; Nuss, G. W. Carrageenin-induced edema in hind paw of the rat as an assay for antiinflammatory drugs. *Proc. Soc. Exp. Biol. Med.* **1962**, *111*, 544-547.
5. Uludag, M. O.; Erguen, B. C.; Alkan, D. A.; Ercan, N.; Oezkan, G. Y.; Banoglu, E.; Mecit Orhan Uludag, B. C. E., Duygu Asli Alkan, Niluefer Ercan, Gueler Yagmur Oezkan, Erden Banoglu Stable ester and amide conjugates of some NSAIDs as analgesic and antiinflammatory compounds with improved biological activity. *Turk J Chem* **2011**, *35*, 427-439.
6. Perez, C.; Daniel, K. B.; Cohen, S. M. Evaluating Prodrug Strategies for Esterase-Triggered Release of Alcohols. *ChemMedChem* **2013**.
7. Jain, A. N. Surflex: fully automatic flexible molecular docking using a molecular similarity-based search engine. *J. Med. Chem.* **2003**, *46* (4), 499-511.
8. Vecchio, A. J.; Malkowski, M. G. The structural basis of endocannabinoid oxygenation by cyclooxygenase-2. *J. Biol. Chem.* **2011**, *286* (23), 20736-20745.
9. Kiefer, J. R.; Pawlitz, J. L.; Moreland, K. T.; Stegeman, R. A.; Hood, W. F.; Gierse, J. K.; Stevens, A. M.; Goodwin, D. C.; Rowlinson, S. W.; Marnett, L. J.; Stallings, W. C.; Kurumbail, R. G. Structural insights into the stereochemistry of the cyclooxygenase reaction. *Nature* **2000**, *405* (6782), 97-101.
